# Supplementary material for: Single Nucleotide Polymorphisms of Interleukins and Toll-like Receptors and Neuroimaging Results in Newborns with Congenital HCMV Infection
Source: MDPI journal article supplement (doi:10.3390/v13091783), 2021-09-07
Supplement: s1 [file s1]

**Table S1.** Associations between SNPs and lenticulostriate vasculopathy (LSV) on cUS in infants with cCMV.

| Gene    | dbSNP ID number <sup>1</sup> | Genetic Model | Genotype | Without LSV<br><i>n</i> = 51 | LSV<br><i>n</i> = 41 | OR (95% CI)       | <i>P</i> -value <sup>2</sup> | AIC   |
|---------|------------------------------|---------------|----------|------------------------------|----------------------|-------------------|------------------------------|-------|
| IL1B    | rs16944 (G/A)                | Codominant    | G/G      | 19 (37.2%)                   | 17 (41.5%)           | 1.00              | 0.65                         | 131.6 |
|         |                              |               | G/A      | 27 (52.9%)                   | 22 (53.7%)           | 0.91 (0.38-2.16)  |                              |       |
|         |                              |               | A/A      | 5 (9.8%)                     | 2 (4.9%)             | 0.45 (0.08-2.61)  |                              |       |
|         |                              | Dominant      | G/G      | 19 (37.2%)                   | 17 (41.5%)           | 1.00              | 0.68                         | 130.3 |
|         |                              |               | G/A-A/A  | 32 (62.8%)                   | 24 (58.5%)           | 0.84 (0.36-1.94)  |                              |       |
|         |                              | Recessive     | G/G-G/A  | 46 (90.2%)                   | 39 (95.1%)           | 1.00              | 0.37                         | 129.6 |
|         |                              |               | A/A      | 5 (9.8%)                     | 2 (4.9%)             | 0.47 (0.09-2.57)  |                              |       |
|         |                              | Overdominant  | G/G-A/A  | 24 (47.1%)                   | 19 (46.3%)           | 1.00              | 0.95                         | 130.4 |
|         |                              |               | G/A      | 27 (52.9%)                   | 22 (53.7%)           | 1.03 (0.45-2.35)  |                              |       |
|         |                              | Log-additive  | ---      | ---                          | ---                  | 0.78 (0.39-1.54)  | 0.47                         | 129.9 |
| IL12B   | rs3212227 (T/G)              | Codominant    | T/T      | 33 (64.7%)                   | 24 (58.5%)           | 1.00              | 0.79                         | 132   |
|         |                              |               | T/G      | 14 (27.4%)                   | 14 (34.1%)           | 1.37 (0.55-3.41)  |                              |       |
|         |                              |               | G/G      | 4 (7.8%)                     | 3 (7.3%)             | 1.03 (0.21-5.04)  |                              |       |
|         |                              | Dominant      | T/T      | 33 (64.7%)                   | 24 (58.5%)           | 1.00              | 0.54                         | 130.1 |
|         |                              |               | T/G-G/G  | 18 (35.3%)                   | 17 (41.5%)           | 1.30 (0.56-3.03)  |                              |       |
|         |                              | Recessive     | T/T-T/G  | 47 (92.2%)                   | 38 (92.7%)           | 1.00              | 0.92                         | 130.4 |
|         |                              |               | G/G      | 4 (7.8%)                     | 3 (7.3%)             | 0.93 (0.20-4.40)  |                              |       |
|         |                              | Overdominant  | T/T-G/G  | 37 (72.5%)                   | 27 (65.8%)           | 1.00              | 0.49                         | 130   |
|         |                              |               | T/G      | 14 (27.4%)                   | 14 (34.1%)           | 1.37 (0.56-3.34)  |                              |       |
|         |                              | Log-additive  | ---      | ---                          | ---                  | 1.15 (0.60-2.20)  | 0.67                         | 130.3 |
| IL28B   | rs12979860 (C/T)             | Codominant    | C/C      | 25 (49%)                     | 16 (39%)             | 1.00              | 0.61                         | 131.5 |
|         |                              |               | C/T      | 19 (37.2%)                   | 19 (46.3%)           | 1.56 (0.64-3.82)  |                              |       |
|         |                              |               | T/T      | 7 (13.7%)                    | 6 (14.6%)            | 1.34 (0.38-4.71)  |                              |       |
|         |                              | Dominant      | C/C      | 25 (49%)                     | 16 (39%)             | 1.00              | 0.34                         | 129.5 |
|         |                              |               | C/T-T/T  | 26 (51%)                     | 25 (61%)             | 1.50 (0.65-3.46)  |                              |       |
|         |                              | Recessive     | C/C-C/T  | 44 (86.3%)                   | 35 (85.4%)           | 1.00              | 0.9                          | 130.4 |
|         |                              |               | T/T      | 7 (13.7%)                    | 6 (14.6%)            | 1.08 (0.33-3.50)  |                              |       |
|         |                              | Overdominant  | C/C-T/T  | 32 (62.8%)                   | 22 (53.7%)           | 1.00              | 0.38                         | 129.7 |
|         |                              | Log-additive  | ---      | ---                          | ---                  | 1.25 (0.69-2.24)  | 0.46                         | 129.9 |
| CCL2    | rs1024611 (A/G)              | Codominant    | A/A      | 29 (56.9%)                   | 21 (51.2%)           | 1.00              | 0.68                         | 131.7 |
|         |                              |               | A/G      | 21 (41.2%)                   | 18 (43.9%)           | 1.18 (0.51-2.75)  |                              |       |
|         |                              |               | G/G      | 1 (2%)                       | 2 (4.9%)             | 2.76 (0.23-32.50) |                              |       |
|         |                              | Dominant      | A/A      | 29 (56.9%)                   | 21 (51.2%)           | 1.00              | 0.59                         | 130.2 |
|         |                              |               | A/G-G/G  | 22 (43.1%)                   | 20 (48.8%)           | 1.26 (0.55-2.87)  |                              |       |
|         |                              | Recessive     | A/A-A/G  | 50 (98%)                     | 39 (95.1%)           | 1.00              | 0.43                         | 129.8 |
|         |                              |               | G/G      | 1 (2%)                       | 2 (4.9%)             | 2.56 (0.22-29.32) |                              |       |
|         |                              | Overdominant  | A/A-G/G  | 30 (58.8%)                   | 23 (56.1%)           | 1.00              | 0.79                         | 130.4 |
|         |                              |               | A/G      | 21 (41.2%)                   | 18 (43.9%)           | 1.12 (0.49-2.57)  |                              |       |
|         |                              | Log-additive  | ---      | ---                          | ---                  | 1.31 (0.63-2.73)  | 0.47                         | 129.9 |
| DC-SIGN | rs735240 (G/A)               | Codominant    | G/G      | 19 (37.2%)                   | 16 (39%)             | 1.00              | 0.78                         | 131.9 |
|         |                              |               | G/A      | 22 (43.1%)                   | 15 (36.6%)           | 0.81 (0.32-2.06)  |                              |       |

|      |                    |              |         |            |            |                   |       |       |
|------|--------------------|--------------|---------|------------|------------|-------------------|-------|-------|
|      |                    |              | A/A     | 10 (19.6%) | 10 (24.4%) | 1.19 (0.40-3.57)  |       |       |
|      |                    | Dominant     | G/G     | 19 (37.2%) | 16 (39%)   | 1.00              | 0.86  | 130.4 |
|      |                    |              | G/A-A/A | 32 (62.8%) | 25 (61%)   | 0.93 (0.40-2.16)  |       |       |
|      |                    | Recessive    | G/G-G/A | 41 (80.4%) | 31 (75.6%) | 1.00              | 0.58  | 130.1 |
|      |                    |              | A/A     | 10 (19.6%) | 10 (24.4%) | 1.32 (0.49-3.57)  |       |       |
|      |                    | Overdominant | G/G-A/A | 29 (56.9%) | 26 (63.4%) | 1.00              | 0.52  | 130   |
|      |                    |              | G/A     | 22 (43.1%) | 15 (36.6%) | 0.76 (0.33-1.77)  |       |       |
|      |                    | Log-additive | ---     | ---        | ---        | 1.05 (0.61-1.82)  | 0.85  | 130.4 |
| TLR2 | rs5743708<br>(G/A) | ---          | G/G     | 48 (94.1%) | 34 (82.9%) | 1.00              | 0.085 | 127.5 |
|      |                    |              | G/A     | 3 (5.9%)   | 7 (17.1%)  | 3.29 (0.79-13.66) |       |       |
| TLR4 | rs4986791<br>(C/T) | ----         | C/C     | 47 (92.2%) | 36 (87.8%) | 1.00              | 0.49  | 130   |
|      |                    |              | C/T     | 4 (7.8%)   | 5 (12.2%)  | 1.63 (0.41-6.52)  |       |       |
|      |                    | Codominant   | T/T     | 17 (33.3%) | 13 (31.7%) | 1.00              |       |       |
|      |                    |              | C/T     | 26 (51%)   | 21 (51.2%) | 1.06 (0.42-2.66)  | 0.98  | 132.4 |
|      |                    |              | C/C     | 8 (15.7%)  | 7 (17.1%)  | 1.14 (0.33-3.97)  |       |       |
|      |                    | Dominant     | T/T     | 17 (33.3%) | 13 (31.7%) | 1.00              | 0.87  | 130.4 |
|      |                    |              | C/T-C/C | 34 (66.7%) | 28 (68.3%) | 1.08 (0.45-2.59)  |       |       |
|      |                    | Recessive    | T/T-C/T | 43 (84.3%) | 34 (82.9%) | 1.00              | 0.86  | 130.4 |
|      |                    |              | C/C     | 8 (15.7%)  | 7 (17.1%)  | 1.11 (0.36-3.36)  |       |       |
|      |                    | Overdominant | T/T-C/C | 25 (49%)   | 20 (48.8%) | 1.00              | 0.98  | 130.4 |
|      |                    |              | C/T     | 26 (51%)   | 21 (51.2%) | 1.01 (0.44-2.30)  |       |       |
|      |                    | Log-additive | ---     | ---        | ---        | 1.07 (0.58-1.95)  | 0.83  | 130.4 |

Data presented as number (%), cUS, cranial ultrasound; cCMV, congenital HCMV infection; LSV, lenticulostriate vasculopathy; OR, odds ratio; CI, confidence interval; NA, not applicable; AIC, Akaike information criteria; IL, Interleukin; CCL 2, C-C motif chemokine ligand 2; DC-SIGN, dendritic cell-specific ICAM-grabbing non-integrin; TLR, Toll-like receptor; <sup>1</sup> SNP database (dbSNP) reference number (ID number); <sup>2</sup> P-value for comparison between asymptomatic and symptomatic group;

**Table S2.** Associations between SNPs and increased periventricular echogenicity on cUS in infants with cCMV.

| Gene | dbSNP ID number <sup>1</sup> | Genetic Model | Genotype | Without increased periventricular echogenicity<br><i>n</i> = 68 | Increased periventricular echogenicity<br><i>n</i> = 24 | OR (95% CI)      | <i>P</i> -value <sup>2</sup> | AIC   |
|------|------------------------------|---------------|----------|-----------------------------------------------------------------|---------------------------------------------------------|------------------|------------------------------|-------|
|      |                              |               | G/G      | 26 (38.2%)                                                      | 10 (41.7%)                                              | 1.00             |                              |       |
|      |                              | Codominant    | G/A      | 37 (54.4%)                                                      | 12 (50%)                                                | 0.84 (0.32-2.24) | 0.93                         | 111.5 |
|      |                              |               | A/A      | 5 (7.3%)                                                        | 2 (8.3%)                                                | 1.04 (0.17-6.26) |                              |       |
|      |                              | Dominant      | G/G      | 26 (38.2%)                                                      | 10 (41.7%)                                              | 1.00             | 0.77                         | 109.5 |
|      |                              |               | G/A-A/A  | 42 (61.8%)                                                      | 14 (58.3%)                                              | 0.87 (0.34-2.24) |                              |       |
|      |                              | Recessive     | G/G G/A  | 63 (92.7%)                                                      | 22 (91.7%)                                              | 1.00             | 0.88                         | 109.6 |
|      |                              |               | A/A      | 5 (7.3%)                                                        | 2 (8.3%)                                                | 1.15 (0.21-6.33) |                              |       |
|      |                              | Overdominant  | G/G-A/A  | 31 (45.6%)                                                      | 12 (50%)                                                | 1.00             | 0.71                         | 109.5 |
|      |                              |               | G/A      | 37 (54.4%)                                                      | 12 (50%)                                                | 0.84 (0.33-2.13) |                              |       |
|      |                              | Log-additive  | ---      | ---                                                             | ---                                                     | 0.94 (0.43-2.02) | 0.86                         | 109.6 |
|      |                              |               | T/T      | 39 (57.4%)                                                      | 18 (75%)                                                | 1.00             |                              |       |
|      |                              | Codominant    | T/G      | 22 (32.4%)                                                      | 6 (25%)                                                 | 0.59 (0.20-1.71) | 0.067                        | 106.2 |
|      |                              |               | G/G      | 7 (10.3%)                                                       | 0 (0%)                                                  | 0.00 (0.00-NA)   |                              |       |
|      |                              | Dominant      | T/T      | 39 (57.4%)                                                      | 18 (75%)                                                | 1.00             | 0.12                         | 107.2 |
|      |                              |               | T/G-G/G  | 29 (42.6%)                                                      | 6 (25%)                                                 | 0.45 (0.16-1.27) |                              |       |

|         |                     |              |         |            |            |                   |       |       |
|---------|---------------------|--------------|---------|------------|------------|-------------------|-------|-------|
| IL28B   | rs12979860<br>(C/T) | Recessive    | T/T-T/G | 61 (89.7%) | 24 (100%)  | 1.00              | 0.035 | 105.2 |
|         |                     |              | G/G     | 7 (10.3%)  | 0 (0%)     | 0.00 (0.00-NA)    |       |       |
|         |                     | Overdominant | T/T-G/G | 46 (67.7%) | 18 (75%)   | 1.00              | 0.5   | 109.1 |
|         |                     |              | T/G     | 22 (32.4%) | 6 (25%)    | 0.70 (0.24-2.00)  |       |       |
|         |                     | Log-additive | ---     | ---        | ---        | 0.43 (0.17-1.08)  | 0.049 | 105.7 |
|         |                     | Codominant   | C/C     | 30 (44.1%) | 11 (45.8%) | 1.00              | 0.6   | 110.6 |
|         |                     |              | C/T     | 27 (39.7%) | 11 (45.8%) | 1.11 (0.42-2.97)  |       |       |
|         |                     |              | T/T     | 11 (16.2%) | 2 (8.3%)   | 0.50 (0.09-2.60)  |       |       |
|         |                     | Dominant     | C/C     | 30 (44.1%) | 11 (45.8%) | 1.00              | 0.88  | 109.6 |
|         |                     |              | C/T-T/T | 38 (55.9%) | 13 (54.2%) | 0.93 (0.37-2.38)  |       |       |
| CCL2    | rs1024611<br>(A/G)  | Recessive    | C/C-C/T | 57 (83.8%) | 22 (91.7%) | 1.00              | 0.32  | 108.6 |
|         |                     |              | T/T     | 11 (16.2%) | 2 (8.3%)   | 0.47 (0.10-2.30)  |       |       |
|         |                     | Overdominant | C/C-T/T | 41 (60.3%) | 13 (54.2%) | 1.00              | 0.6   | 109.3 |
|         |                     |              | C/T     | 27 (39.7%) | 11 (45.8%) | 1.28 (0.50-3.28)  |       |       |
|         |                     | Log-additive | ---     | ---        | ---        | 0.82 (0.42-1.61)  | 0.56  | 109.3 |
|         |                     | Codominant   | A/A     | 35 (51.5%) | 15 (62.5%) | 1.00              | 0.3   | 109.2 |
|         |                     |              | A/G     | 30 (44.1%) | 9 (37.5%)  | 0.70 (0.27-1.83)  |       |       |
|         |                     |              | G/G     | 3 (4.4%)   | 0 (0%)     | 0.00 (0.00-NA)    |       |       |
|         |                     | Dominant     | A/A     | 35 (51.5%) | 15 (62.5%) | 1.00              | 0.35  | 108.7 |
|         |                     |              | A/G-G/G | 33 (48.5%) | 9 (37.5%)  | 0.64 (0.25-1.65)  |       |       |
| DC-SIGN | rs735240<br>(G/A)   | Recessive    | A/A-A/G | 65 (95.6%) | 24 (100%)  | 1.00              | 0.17  | 107.8 |
|         |                     |              | G/G     | 3 (4.4%)   | 0 (0%)     | 0.00 (0.00-NA)    |       |       |
|         |                     | Overdominant | A/A-G/G | 38 (55.9%) | 15 (62.5%) | 1.00              | 0.57  | 109.3 |
|         |                     |              | A/G     | 30 (44.1%) | 9 (37.5%)  | 0.76 (0.29-1.98)  |       |       |
|         |                     | Log-additive | ---     | ---        | ---        | 0.60 (0.25-1.44)  | 0.24  | 108.2 |
|         |                     | Codominant   | G/G     | 27 (39.7%) | 8 (33.3%)  | 1.00              | 0.3   | 109.2 |
|         |                     |              | G/A     | 29 (42.6%) | 8 (33.3%)  | 0.93 (0.31-2.83)  |       |       |
|         |                     |              | A/A     | 12 (17.6%) | 8 (33.3%)  | 2.25 (0.68-7.42)  |       |       |
|         |                     | Dominant     | G/G     | 27 (39.7%) | 8 (33.3%)  | 1.00              | 0.58  | 109.3 |
|         |                     |              | G/A-A/A | 41 (60.3%) | 16 (66.7%) | 1.32 (0.50-3.50)  |       |       |
| TLR2    | rs5743708<br>(G/A)  | Recessive    | G/G-G/A | 56 (82.3%) | 16 (66.7%) | 1.00              | 0.12  | 107.2 |
|         |                     |              | A/A     | 12 (17.6%) | 8 (33.3%)  | 2.33 (0.81-6.69)  |       |       |
|         |                     | Overdominant | G/G-A/A | 39 (57.4%) | 16 (66.7%) | 1.00              | 0.42  | 109   |
|         |                     |              | G/A     | 29 (42.6%) | 8 (33.3%)  | 0.67 (0.25-1.78)  |       |       |
|         |                     | Log-additive | ---     | ---        | ---        | 1.47 (0.79-2.72)  | 0.22  | 108.1 |
|         |                     | Codominant   | G/G     | 27 (39.7%) | 8 (33.3%)  | 1.00              | 0.77  | 109.5 |
|         |                     |              | G/A     | 7 (10.3%)  | 3 (12.5%)  | 1.24 (0.29-5.26)  |       |       |
|         |                     |              | A/A     | 12 (17.6%) | 8 (33.3%)  | 2.25 (0.68-7.42)  |       |       |
|         |                     | Dominant     | G/G     | 27 (39.7%) | 8 (33.3%)  | 1.00              | 0.58  | 109.3 |
|         |                     |              | G/A-A/A | 41 (60.3%) | 16 (66.7%) | 1.32 (0.50-3.50)  |       |       |
| TLR4    | rs4986791<br>(C/T)  | ---          | C/C     | 63 (92.7%) | 20 (83.3%) | 1.00              | 0.21  | 108   |
|         |                     |              | C/T     | 5 (7.3%)   | 4 (16.7%)  | 2.52 (0.62-10.30) |       |       |
| TLR9    | rs352140<br>(C/T)   | Codominant   | T/T     | 22 (32.4%) | 8 (33.3%)  | 1.00              | 0.37  | 109.6 |
|         |                     |              | C/T     | 37 (54.4%) | 10 (41.7%) | 0.74 (0.26-2.16)  |       |       |
|         |                     |              | C/C     | 9 (13.2%)  | 6 (25%)    | 1.83 (0.49-6.81)  |       |       |
|         |                     | Dominant     | T/T     | 22 (32.4%) | 8 (33.3%)  | 1.00              | 0.93  | 109.6 |
|         |                     |              | C/T-C/C | 46 (67.7%) | 16 (66.7%) | 0.96 (0.36-2.57)  |       |       |
|         |                     | Recessive    | T/T-C/T | 59 (86.8%) | 18 (75%)   | 1.00              | 0.2   | 107.9 |
|         |                     |              | C/C     | 9 (13.2%)  | 6 (25%)    | 2.19 (0.69-6.97)  |       |       |

|              |         |            |            |                  |      |       |
|--------------|---------|------------|------------|------------------|------|-------|
| Overdominant | T/T-C/C | 31 (45.6%) | 14 (58.3%) | 1.00             | 0.28 | 108.5 |
|              | C/T     | 37 (54.4%) | 10 (41.7%) | 0.60 (0.23-1.53) |      |       |
| Log-additive | ---     | ---        | ---        | 1.26 (0.64-2.50) | 0.5  | 109.2 |

Data presented as number (%), cUS, cranial ultrasound; cCMV, congenital HCMV infection; OR, odds ratio; CI, confidence interval; NA, not applicable; AIC, Akaike information criteria; IL, Interleukin; CCL 2, C-C motif chemokine ligand 2; DC-SIGN, dendritic cell-specific ICAM-grabbing non-integrin; TLR, Toll-like receptor; <sup>1</sup> SNP database (dbSNP) reference number (ID number); <sup>2</sup> P-value for comparison between asymptomatic and symptomatic group.

**Table S3.** Associations between SNPs and calcifications on cUS in infants with cCMV.

| Gene  | dbSNP ID number <sup>1</sup> | Genetic Model | Genotype | Without calcifications<br><i>n</i> = 67 | Calcifications<br><i>n</i> = 25 | OR (95% CI)      | <i>P</i> -value <sup>2</sup> | AIC   |
|-------|------------------------------|---------------|----------|-----------------------------------------|---------------------------------|------------------|------------------------------|-------|
| IL1B  | rs16944 (G/A)                | Codominant    | G/G      | 26 (38.8%)                              | 10 (40%)                        | 1.00             | 0.99                         | 113.6 |
|       |                              |               | G/A      | 36 (53.7%)                              | 13 (52%)                        | 0.94 (0.36-2.47) |                              |       |
|       |                              |               | A/A      | 5 (7.5%)                                | 2 (8%)                          | 1.04 (0.17-6.26) |                              |       |
|       |                              | Dominant      | G/G      | 26 (38.8%)                              | 10 (40%)                        | 1.00             | 0.92                         | 111.6 |
|       |                              |               | G/A-A/A  | 41 (61.2%)                              | 15 (60%)                        | 0.95 (0.37-2.43) |                              |       |
|       |                              | Recessive     | G/G-G/A  | 62 (92.5%)                              | 23 (92%)                        | 1.00             | 0.93                         | 111.6 |
|       |                              |               | A/A      | 5 (7.5%)                                | 2 (8%)                          | 1.08 (0.20-5.95) |                              |       |
|       |                              | Overdominant  | G/G-A/A  | 31 (46.3%)                              | 12 (48%)                        | 1.00             | 0.88                         | 111.6 |
|       |                              |               | G/A      | 36 (53.7%)                              | 13 (52%)                        | 0.93 (0.37-2.34) |                              |       |
|       |                              | Log-additive  | ---      | ---                                     | ---                             | 0.98 (0.46-2.10) | 0.96                         | 111.6 |
| IL12B | rs3212227 (T/G)              | Codominant    | T/T      | 38 (56.7%)                              | 19 (76%)                        | 1.00             | 0.15                         | 109.9 |
|       |                              |               | T/G      | 24 (35.8%)                              | 4 (16%)                         | 0.33 (0.10-1.10) |                              |       |
|       |                              |               | G/G      | 5 (7.5%)                                | 2 (8%)                          | 0.80 (0.14-4.51) |                              |       |
|       |                              | Dominant      | T/T      | 38 (56.7%)                              | 19 (76%)                        | 1.00             | 0.083                        | 108.6 |
|       |                              |               | T/G-G/G  | 29 (43.3%)                              | 6 (24%)                         | 0.41 (0.15-1.17) |                              |       |
|       |                              | Recessive     | T/T-T/G  | 62 (92.5%)                              | 23 (92%)                        | 1.00             | 0.93                         | 111.6 |
|       |                              |               | G/G      | 5 (7.5%)                                | 2 (8%)                          | 1.08 (0.20-5.95) |                              |       |
|       |                              | Overdominant  | T/T-G/G  | 43 (64.2%)                              | 21 (84%)                        | 1.00             | 0.056                        | 108   |
|       |                              |               | T/G      | 24 (35.8%)                              | 4 (16%)                         | 0.34 (0.10-1.11) |                              |       |
|       |                              | Log-additive  | ---      | ---                                     | ---                             | 0.60 (0.26-1.34) | 0.19                         | 109.9 |
| IL28B | rs12979860 (C/T)             | Codominant    | C/C      | 29 (43.3%)                              | 12 (48%)                        | 1.00             | 0.81                         | 113.2 |
|       |                              |               | T/C      | 29 (43.3%)                              | 9 (36%)                         | 0.75 (0.27-2.05) |                              |       |
|       |                              |               | T/T      | 9 (13.4%)                               | 4 (16%)                         | 1.07 (0.28-4.17) |                              |       |
|       |                              | Dominant      | C/C      | 29 (43.3%)                              | 12 (48%)                        | 1.00             | 0.69                         | 111.5 |
|       |                              |               | C/T-T/T  | 38 (56.7%)                              | 13 (52%)                        | 0.83 (0.33-2.08) |                              |       |
|       |                              | Recessive     | C/C-C/T  | 58 (86.6%)                              | 21 (84%)                        | 1.00             | 0.76                         | 111.5 |
|       |                              |               | T/T      | 9 (13.4%)                               | 4 (16%)                         | 1.23 (0.34-4.41) |                              |       |
|       |                              | Overdominant  | C/C-T/T  | 38 (56.7%)                              | 16 (64%)                        | 1.00             | 0.53                         | 111.2 |
|       |                              |               | C/T      | 29 (43.3%)                              | 9 (36%)                         | 0.74 (0.29-1.90) |                              |       |
|       |                              | Log-additive  | ---      | ---                                     | ---                             | 0.96 (0.50-1.84) | 0.9                          | 111.6 |
| CCL2  | rs1024611 (A/G)              | Codominant    | A/A      | 34 (50.8%)                              | 16 (64%)                        | 1.00             | 0.24                         | 110.8 |
|       |                              |               | A/G      | 30 (44.8%)                              | 9 (36%)                         | 0.64 (0.25-1.65) |                              |       |
|       |                              |               | G/G      | 3 (4.5%)                                | 0 (0%)                          | 0.00 (0.00-NA)   |                              |       |
|       |                              | Dominant      | A/A      | 34 (50.8%)                              | 16 (64%)                        | 1.00             | 0.25                         | 110.3 |
|       |                              |               | A/G-G/G  | 33 (49.2%)                              | 9 (36%)                         | 0.58 (0.22-1.49) |                              |       |

|         |                    |              |         |            |           |                   |       |       |
|---------|--------------------|--------------|---------|------------|-----------|-------------------|-------|-------|
| DC-SIGN | rs735240<br>(G/A)  | Recessive    | A/A-A/G | 64 (95.5%) | 25 (100%) | 1.00              | 0.16  | 109.7 |
|         |                    |              | G/G     | 3 (4.5%)   | 0 (0%)    | 0.00 (0.00-NA)    |       |       |
|         |                    | Overdominant | A/A-G/G | 37 (55.2%) | 16 (64%)  | 1.00              | 0.45  | 111.1 |
|         |                    | Log-additive | ---     | ---        | ---       | 0.55 (0.23-1.32)  | 0.17  | 109.7 |
|         |                    | Codominant   | G/G     | 22 (32.8%) | 13 (52%)  | 1.00              | 0.25  | 110.8 |
|         |                    |              | G/A     | 29 (43.3%) | 8 (32%)   | 0.47 (0.16-1.32)  |       |       |
|         |                    |              | A/A     | 16 (23.9%) | 4 (16%)   | 0.42 (0.12-1.54)  |       |       |
|         |                    | Dominant     | G/G     | 22 (32.8%) | 13 (52%)  | 1.00              | 0.095 | 108.9 |
|         |                    |              | G/A-A/A | 45 (67.2%) | 12 (48%)  | 0.45 (0.18-1.15)  |       |       |
|         |                    | Recessive    | G/G-G/A | 51 (76.1%) | 21 (84%)  | 1.00              | 0.4   | 110.9 |
|         |                    |              | A/A     | 16 (23.9%) | 4 (16%)   | 0.61 (0.18-2.03)  |       |       |
|         |                    | Overdominant | G/G-A/A | 38 (56.7%) | 17 (68%)  | 1.00              | 0.32  | 110.7 |
|         |                    |              | G/A     | 29 (43.3%) | 8 (32%)   | 0.62 (0.23-1.63)  |       |       |
|         |                    | Log-additive | ---     | ---        | ---       | 0.61 (0.32-1.16)  | 0.12  | 109.2 |
| TLR2    | rs5743708<br>(G/A) | ---          | G/G     | 62 (92.5%) | 20 (80%)  | 1.00              | 0.1   | 109   |
|         |                    |              | G/A     | 5 (7.5%)   | 5 (20%)   | 3.10 (0.81-11.82) |       |       |
| TLR4    | rs4986791<br>(C/T) | ---          | C/C     | 61 (91%)   | 22 (88%)  | 1.00              | 0.67  | 111.5 |
|         |                    |              | C/T     | 6 (9%)     | 3 (12%)   | 1.39 (0.32-6.02)  |       |       |
| TLR9    | rs352140<br>(C/T)  | Codominant   | T/T     | 21 (31.3%) | 9 (36%)   | 1.00              | 0.76  | 113.1 |
|         |                    |              | C/T     | 34 (50.8%) | 13 (52%)  | 0.89 (0.33-2.45)  |       |       |
|         |                    |              | C/C     | 12 (17.9%) | 3 (12%)   | 0.58 (0.13-2.58)  |       |       |
|         |                    | Dominant     | T/T     | 21 (31.3%) | 9 (36%)   | 1.00              | 0.67  | 111.5 |
|         |                    |              | C/T-C/C | 46 (68.7%) | 16 (64%)  | 0.81 (0.31-2.13)  |       |       |
|         |                    | Recessive    | T/T-C/T | 55 (82.1%) | 22 (88%)  | 1.00              | 0.48  | 111.1 |
|         |                    |              | C/C     | 12 (17.9%) | 3 (12%)   | 0.62 (0.16-2.43)  |       |       |
|         |                    | Overdominant | T/T-C/C | 33 (49.2%) | 12 (48%)  | 1.00              | 0.91  | 111.6 |
|         |                    |              | C/T     | 34 (50.8%) | 13 (52%)  | 1.05 (0.42-2.64)  |       |       |
|         |                    | Log-additive | ---     | ---        | ---       | 0.79 (0.40-1.57)  | 0.51  | 111.2 |

Data presented as number (%), cUS, cranial ultrasound; cCMV, congenital HCMV infection; OR, odds ratio; CI, confidence interval; NA, not applicable; AIC, Akaike information criteria; IL, Interleukin; CCL 2, C-C motif chemokine ligand 2; DC-SIGN, dendritic cell-specific ICAM-grabbing non-integrin; TLR, Toll-like receptor; <sup>1</sup> SNP database (dbSNP) reference number (ID number); <sup>2</sup> P-value for comparison between asymptomatic and symptomatic group.

**Table S4.** Associations between SNPs and abnormal myelination on MRI in infants with cCMV.

| Gene | dbSNP ID number <sup>1</sup> | Genetic Model | Genotype | Without abnormal myelination<br><i>n</i> = 72 | Abnormal myelination<br><i>n</i> = 15 | OR (95% CI)      | <i>P</i> -value <sup>2</sup> | AIC  |
|------|------------------------------|---------------|----------|-----------------------------------------------|---------------------------------------|------------------|------------------------------|------|
| IL1B | rs16944<br>(G/A)             | Codominant    | G/G      | 27 (37.5%)                                    | 8 (53.3%)                             | 1.00             | 0.18                         | 82.5 |
|      |                              |               | G/A      | 38 (52.8%)                                    | 7 (46.7%)                             | 0.62 (0.20-1.92) |                              |      |
|      |                              |               | A/A      | 7 (9.7%)                                      | 0 (0%)                                | 0.00 (0.00-NA)   |                              |      |
|      |                              | Dominant      | G/G      | 27 (37.5%)                                    | 8 (53.3%)                             | 1.00             | 0.26                         | 82.7 |
|      |                              |               | G/A-A/A  | 45 (62.5%)                                    | 7 (46.7%)                             | 0.52 (0.17-1.61) |                              |      |
|      |                              | Recessive     | G/G-G/A  | 65 (90.3%)                                    | 15 (100%)                             | 1.00             | 0.096                        | 81.2 |
|      |                              |               | A/A      | 7 (9.7%)                                      | 0 (0%)                                | 0.00 (0.00-NA)   |                              |      |
|      |                              | Overdominant  | G/G-A/A  | 34 (47.2%)                                    | 8 (53.3%)                             | 1.00             | 0.67                         | 83.8 |
|      |                              |               | G/A      | 38 (52.8%)                                    | 7 (46.7%)                             | 0.78 (0.26-2.39) |                              |      |
|      |                              | Log-additive  | -        | -                                             | -                                     | 0.48 (0.18-1.30) | 0.13                         | 81.7 |

|         |                     |              |         |            |            |                   |       |      |
|---------|---------------------|--------------|---------|------------|------------|-------------------|-------|------|
| IL12B   | rs3212227<br>(T/G)  | Codominant   | T/T     | 41 (56.9%) | 12 (80%)   | 1.00              | 0.11  | 81.5 |
|         |                     |              | T/G     | 24 (33.3%) | 3 (20%)    | 0.43 (0.11-1.67)  |       |      |
|         |                     |              | G/G     | 7 (9.7%)   | 0 (0%)     | 0.00 (0.00-NA)    |       |      |
|         |                     | Dominant     | T/T     | 41 (56.9%) | 12 (80%)   | 1.00              | 0.084 | 81   |
|         |                     |              | T/G-G/G | 31 (43.1%) | 3 (20%)    | 0.33 (0.09-1.27)  |       |      |
|         |                     | Recessive    | T/T-T/G | 65 (90.3%) | 15 (100%)  | 1.00              | 0.096 | 81.2 |
|         |                     |              | G/G     | 7 (9.7%)   | 0 (0%)     | 0.00 (0.00-NA)    |       |      |
|         |                     | Overdominant | T/T-G/G | 48 (66.7%) | 12 (80%)   | 1.00              | 0.29  | 82.9 |
|         |                     |              | T/G     | 24 (33.3%) | 3 (20%)    | 0.50 (0.13-1.94)  |       |      |
|         |                     | Log-additive | -       | -          | -          | 0.34 (0.10-1.16)  | 0.049 | 80.1 |
| IL28B   | rs12979860<br>(C/T) | Codominant   | C/C     | 30 (41.7%) | 7 (46.7%)  | 1.00              | 0.69  | 85.2 |
|         |                     |              | C/T     | 32 (44.4%) | 5 (33.3%)  | 0.67 (0.19-2.34)  |       |      |
|         |                     |              | T/T     | 10 (13.9%) | 3 (20%)    | 1.29 (0.28-5.94)  |       |      |
|         |                     | Dominant     | C/C     | 30 (41.7%) | 7 (46.7%)  | 1.00              | 0.72  | 83.9 |
|         |                     |              | C/T-T/T | 42 (58.3%) | 8 (53.3%)  | 0.82 (0.27-2.50)  |       |      |
|         |                     | Recessive    | C/C-C/T | 62 (86.1%) | 12 (80%)   | 1.00              | 0.56  | 83.6 |
|         |                     |              | T/T     | 10 (13.9%) | 3 (20%)    | 1.55 (0.37-6.48)  |       |      |
|         |                     | Overdominant | C/C-T/T | 40 (55.6%) | 10 (66.7%) | 1.00              | 0.42  | 83.3 |
|         |                     |              | C/T     | 32 (44.4%) | 5 (33.3%)  | 0.63 (0.19-2.01)  |       |      |
|         |                     | Log-additive | -       | -          | -          | 1.02 (0.47-2.24)  | 0.96  | 84   |
| CCL2    | rs1024611<br>(A/G)  | Codominant   | A/A     | 37 (51.4%) | 8 (53.3%)  | 1.00              | 0.76  | 85.4 |
|         |                     |              | A/G     | 33 (45.8%) | 6 (40%)    | 0.84 (0.26-2.68)  |       |      |
|         |                     |              | G/G     | 2 (2.8%)   | 1 (6.7%)   | 2.31 (0.19-28.72) |       |      |
|         |                     | Dominant     | A/A     | 37 (51.4%) | 8 (53.3%)  | 1.00              | 0.89  | 84   |
|         |                     |              | A/G-G/G | 35 (48.6%) | 7 (46.7%)  | 0.92 (0.30-2.82)  |       |      |
|         |                     | Recessive    | A/A-A/G | 70 (97.2%) | 14 (93.3%) | 1.00              | 0.49  | 83.5 |
|         |                     |              | G/G     | 2 (2.8%)   | 1 (6.7%)   | 2.50 (0.21-29.50) |       |      |
|         |                     | Overdominant | A/A-G/G | 39 (54.2%) | 9 (60%)    | 1.00              | 0.68  | 83.8 |
|         |                     |              | A/G     | 33 (45.8%) | 6 (40%)    | 0.79 (0.25-2.44)  |       |      |
|         |                     | Log-additive | -       | -          | -          | 1.06 (0.40-2.83)  | 0.9   | 84   |
| DC-SIGN | rs735240<br>(G/A)   | Codominant   | G/G     | 26 (36.1%) | 5 (33.3%)  | 1.00              | 0.93  | 85.8 |
|         |                     |              | G/A     | 30 (41.7%) | 6 (40%)    | 1.04 (0.28-3.81)  |       |      |
|         |                     |              | A/A     | 16 (22.2%) | 4 (26.7%)  | 1.30 (0.30-5.57)  |       |      |
|         |                     | Dominant     | G/G     | 26 (36.1%) | 5 (33.3%)  | 1.00              | 0.84  | 83.9 |
|         |                     |              | G/A-A/A | 46 (63.9%) | 10 (66.7%) | 1.13 (0.35-3.67)  |       |      |
|         |                     | Recessive    | G/G-G/A | 56 (77.8%) | 11 (73.3%) | 1.00              | 0.71  | 83.9 |
|         |                     |              | A/A     | 16 (22.2%) | 4 (26.7%)  | 1.27 (0.36-4.54)  |       |      |
|         |                     | Overdominant | G/G-A/A | 42 (58.3%) | 9 (60%)    | 1.00              | 0.9   | 84   |
|         |                     |              | G/A     | 30 (41.7%) | 6 (40%)    | 0.93 (0.30-2.90)  |       |      |
|         |                     | Log-additive | -       | -          | -          | 1.13 (0.54-2.36)  | 0.74  | 83.9 |
| TLR2    | rs5743708<br>(G/A)  | -            | G/G     | 64 (88.9%) | 14 (93.3%) | 1.00              | 0.59  | 83.7 |
|         |                     |              | G/A     | 8 (11.1%)  | 1 (6.7%)   | 0.57 (0.07-4.94)  |       |      |
| TLR4    | rs4986791<br>(C/T)  | -            | C/C     | 67 (93.1%) | 12 (80%)   | 1.00              | 0.15  | 81.9 |
|         |                     |              | C/T     | 5 (6.9%)   | 3 (20%)    | 3.35 (0.71-15.90) |       |      |
| TLR9    | rs352140<br>(C/T)   | Codominant   | T/T     | 23 (31.9%) | 5 (33.3%)  | 1.00              | 0.93  | 85.8 |
|         |                     |              | T/C     | 37 (51.4%) | 7 (46.7%)  | 0.87 (0.25-3.07)  |       |      |
|         |                     |              | C/C     | 12 (16.7%) | 3 (20%)    | 1.15 (0.23-5.65)  |       |      |
|         |                     | Dominant     | T/T     | 23 (31.9%) | 5 (33.3%)  | 1.00              | 0.92  | 84   |
|         |                     |              | C/T-C/C | 49 (68.1%) | 10 (66.7%) | 0.94 (0.29-3.06)  |       |      |
|         |                     | Recessive    | T/T-C/T | 60 (83.3%) | 12 (80%)   | 1.00              | 0.76  | 83.9 |

|  |              |         |            |           |                  |      |      |
|--|--------------|---------|------------|-----------|------------------|------|------|
|  |              | C/C     | 12 (16.7%) | 3 (20%)   | 1.25 (0.31-5.11) |      |      |
|  | Overdominant | T/T-C/C | 35 (48.6%) | 8 (53.3%) | 1.00             | 0.74 | 83.9 |
|  |              | C/T     | 37 (51.4%) | 7 (46.7%) | 0.83 (0.27-2.52) |      |      |
|  | Log-additive | -       | -          | -         | 1.04 (0.46-2.34) | 0.92 | 84   |

Data presented as number (%);MRI, magnetic resonance imaging; cCMV, congenital HCMV infection; OR, odds ratio; CI, confidence interval; NA, not applicable; AIC, Akaike information criteria; IL, Interleukin; CCL 2, C-C motif chemokine ligand 2; DC-SIGN, dendritic cell-specific ICAM-grabbing non-integrin; TLR, Toll-like receptor; <sup>1</sup> SNP database (dbSNP) reference number (ID number); <sup>2</sup> P-value for comparison between asymptomatic and symptomatic group.

**Table S5.** Associations between SNPs and abnormal white matter on MRI in infants with cCMV.

| Gene  | dbSNP ID number <sup>1</sup> | Genetic Model | Genotype | Without abnormal white matter<br><i>n</i> = 23 | Abnormal white matter<br><i>n</i> = 64 | OR (95% CI)       | <i>P</i> -value <sup>2</sup> | AIC   |
|-------|------------------------------|---------------|----------|------------------------------------------------|----------------------------------------|-------------------|------------------------------|-------|
| IL1B  | rs16944 (G/A)                | Codominant    | G/G      | 10 (43.5%)                                     | 25 (39.1%)                             | 1.00              |                              |       |
|       |                              |               | G/A      | 10 (43.5%)                                     | 35 (54.7%)                             | 1.40 (0.51-3.87)  | 0.5                          | 105.1 |
|       |                              |               | A/A      | 3 (13%)                                        | 4 (6.2%)                               | 0.53 (0.10-2.82)  |                              |       |
|       |                              | Dominant      | G/G      | 10 (43.5%)                                     | 25 (39.1%)                             | 1.00              | 0.71                         | 104.4 |
|       |                              |               | G/A-A/A  | 13 (56.5%)                                     | 39 (60.9%)                             | 1.20 (0.46-3.15)  |                              |       |
|       |                              | Recessive     | G/G-G/A  | 20 (87%)                                       | 60 (93.8%)                             | 1.00              | 0.33                         | 103.5 |
|       |                              |               | A/A      | 3 (13%)                                        | 4 (6.2%)                               | 0.44 (0.09-2.16)  |                              |       |
|       |                              | Overdominant  | G/G-A/A  | 13 (56.5%)                                     | 29 (45.3%)                             | 1.00              |                              |       |
|       |                              |               | G/A      | 10 (43.5%)                                     | 35 (54.7%)                             | 1.57 (0.60-4.10)  | 0.36                         | 103.6 |
|       |                              | Log-additive  | ---      | ---                                            | ---                                    | 0.94 (0.43-2.03)  | 0.87                         | 104.5 |
| IL12B | rs3212227 (T/G)              | Codominant    | T/T      | 15 (65.2%)                                     | 38 (59.4%)                             | 1.00              |                              |       |
|       |                              |               | T/G      | 6 (26.1%)                                      | 21 (32.8%)                             | 1.38 (0.47-4.09)  | 0.83                         | 106.1 |
|       |                              |               | G/G      | 2 (8.7%)                                       | 5 (7.8%)                               | 0.99 (0.17-5.65)  |                              |       |
|       |                              | Dominant      | T/T      | 15 (65.2%)                                     | 38 (59.4%)                             | 1.00              | 0.62                         | 104.3 |
|       |                              |               | T/G-G/G  | 8 (34.8%)                                      | 26 (40.6%)                             | 1.28 (0.48-3.46)  |                              |       |
|       |                              | Recessive     | T/T-T/G  | 21 (91.3%)                                     | 59 (92.2%)                             | 1.00              | 0.89                         | 104.5 |
|       |                              |               | G/G      | 2 (8.7%)                                       | 5 (7.8%)                               | 0.89 (0.16-4.94)  |                              |       |
|       |                              | Overdominant  | T/T-G/G  | 17 (73.9%)                                     | 43 (67.2%)                             | 1.00              | 0.55                         | 104.1 |
|       |                              |               | T/G      | 6 (26.1%)                                      | 21 (32.8%)                             | 1.38 (0.48-4.02)  |                              |       |
|       |                              | Log-additive  | ---      | ---                                            | ---                                    | 1.13 (0.53-2.42)  | 0.75                         | 104.4 |
| IL28B | rs12979860 (C/T)             | Codominant    | C/C      | 11 (47.8%)                                     | 26 (40.6%)                             | 1.00              |                              |       |
|       |                              |               | C/T      | 10 (43.5%)                                     | 27 (42.2%)                             | 1.14 (0.42-3.14)  | 0.57                         | 105.4 |
|       |                              |               | T/T      | 2 (8.7%)                                       | 11 (17.2%)                             | 2.33 (0.44-12.28) |                              |       |
|       |                              | Dominant      | C/C      | 11 (47.8%)                                     | 26 (40.6%)                             | 1.00              | 0.55                         | 104.1 |
|       |                              |               | C/T-T/T  | 12 (52.2%)                                     | 38 (59.4%)                             | 1.34 (0.51-3.49)  |                              |       |
|       |                              | Recessive     | C/C-C/T  | 21 (91.3%)                                     | 53 (82.8%)                             | 1.00              | 0.3                          | 103.4 |
|       |                              |               | T/T      | 2 (8.7%)                                       | 11 (17.2%)                             | 2.18 (0.44-10.68) |                              |       |
|       |                              | Overdominant  | C/C-T/T  | 13 (56.5%)                                     | 37 (57.8%)                             | 1.00              | 0.91                         | 104.5 |
|       |                              | Log-additive  | ---      | ---                                            | ---                                    | 1.38 (0.69-2.79)  | 0.36                         | 103.6 |
| CCL2  | rs1024611 (A/G)              | Codominant    | A/A      | 13 (56.5%)                                     | 32 (50%)                               | 1.00              |                              |       |
|       |                              |               | A/G      | 9 (39.1%)                                      | 30 (46.9%)                             | 1.35 (0.51-3.63)  | 0.8                          | 106.1 |
|       |                              |               | G/G      | 1 (4.3%)                                       | 2 (3.1%)                               | 0.81 (0.07-9.76)  |                              |       |
|       |                              | Dominant      | A/A      | 13 (56.5%)                                     | 32 (50%)                               | 1.00              | 0.59                         | 104.2 |
|       |                              |               | A/G-G/G  | 10 (43.5%)                                     | 32 (50%)                               | 1.30 (0.50-3.39)  |                              |       |

|         |                    |              |         |            |            |                   |      |       |
|---------|--------------------|--------------|---------|------------|------------|-------------------|------|-------|
| DC-SIGN | rs735240<br>(G/A)  | Recessive    | A/A-A/G | 22 (95.7%) | 62 (96.9%) | 1.00              | 0.79 | 104.4 |
|         |                    |              | G/G     | 1 (4.3%)   | 2 (3.1%)   | 0.71 (0.06-8.22)  |      |       |
|         |                    |              |         |            |            |                   |      |       |
|         |                    | Overdominant | A/A-G/G | 14 (60.9%) | 34 (53.1%) | 1.00              | 0.52 | 104.1 |
|         |                    |              | A/G     | 9 (39.1%)  | 30 (46.9%) | 1.37 (0.52-3.62)  |      |       |
|         |                    | Log-additive | ---     | ---        | ---        | 1.18 (0.50-2.78)  | 0.7  | 104.3 |
|         |                    | Codominant   | G/G     | 8 (34.8%)  | 23 (35.9%) | 1.00              | 0.68 | 105.7 |
|         |                    |              | G/A     | 11 (47.8%) | 25 (39.1%) | 0.79 (0.27-2.31)  |      |       |
|         |                    |              | A/A     | 4 (17.4%)  | 16 (25%)   | 1.39 (0.36-5.42)  |      |       |
|         |                    | Dominant     | G/G     | 8 (34.8%)  | 23 (35.9%) | 1.00              | 0.92 | 104.5 |
|         |                    |              | G/A-A/A | 15 (65.2%) | 41 (64.1%) | 0.95 (0.35-2.58)  |      |       |
|         |                    | Recessive    | G/G-G/A | 19 (82.6%) | 48 (75%)   | 1.00              | 0.45 | 103.9 |
|         |                    |              | A/A     | 4 (17.4%)  | 16 (25%)   | 1.58 (0.47-5.35)  |      |       |
| TLR2    | rs5743708<br>(G/A) | Overdominant | G/G-A/A | 12 (52.2%) | 39 (60.9%) | 1.00              | 0.47 | 104   |
|         |                    |              | G/A     | 11 (47.8%) | 25 (39.1%) | 0.70 (0.27-1.83)  |      |       |
|         |                    | Log-additive | ---     | ---        | ---        | 1.12 (0.59-2.11)  | 0.72 | 104.4 |
| TLR4    | rs4986791<br>(C/T) | ---          | G/G     | 21 (91.3%) | 57 (89.1%) | 1.00              | 0.76 | 104.4 |
|         |                    |              | G/A     | 2 (8.7%)   | 7 (10.9%)  | 1.29 (0.25-6.71)  |      |       |
| TLR9    | rs352140<br>(C/T)  | Codominant   | C/C     | 21 (91.3%) | 58 (90.6%) | 1.00              | 0.92 | 104.5 |
|         |                    |              | C/T     | 2 (8.7%)   | 6 (9.4%)   | 1.09 (0.20-5.81)  |      |       |
|         |                    |              |         |            |            |                   |      |       |
|         |                    | Dominant     | T/T     | 8 (34.8%)  | 20 (31.2%) | 1.00              | 0.76 | 104.4 |
|         |                    |              | C/T     | 13 (56.5%) | 31 (48.4%) | 0.95 (0.34-2.71)  |      |       |
|         |                    |              | C/C     | 2 (8.7%)   | 13 (20.3%) | 2.60 (0.48-14.23) |      |       |
|         |                    | Recessive    | T/T     | 8 (34.8%)  | 20 (31.2%) | 1.00              | 0.18 | 102.7 |
|         |                    |              | C/T-C/T | 15 (65.2%) | 44 (68.8%) | 1.17 (0.43-3.21)  |      |       |
|         |                    | Overdominant | T/T-C/T | 21 (91.3%) | 51 (79.7%) | 1.00              | 0.51 | 104.1 |
|         |                    |              | C/C     | 2 (8.7%)   | 13 (20.3%) | 2.68 (0.56-12.90) |      |       |
|         |                    | Log-additive | T/T-C/C | 10 (43.5%) | 33 (51.6%) | 1.00              | 0.72 | 104.1 |
|         |                    |              | C/T     | 13 (56.5%) | 31 (48.4%) | 0.72 (0.28-1.89)  |      |       |
|         |                    | Log-additive | ---     | ---        | ---        | 1.39 (0.68-2.82)  | 0.36 | 103.7 |

Data presented as number (%); MRI, magnetic resonance imaging; cCMV, congenital HCMV infection; OR, odds ratio; CI, confidence interval; NA, not applicable; AIC, Akaike information criteria; IL, Interleukin; CCL 2, C-C motif chemokine ligand 2; DC-SIGN, dendritic cell-specific ICAM-grabbing non-integrin; TLR, Toll-like receptor; <sup>1</sup> SNP database (dbSNP) reference number (ID number); <sup>2</sup> P-value for comparison between asymptomatic and symptomatic group.

**Table S6.** Associations between SNPs and calcifications on MRI in infants with cCMV.

| Gene  | dbSNP ID number <sup>1</sup> | Genetic Model | Genotype | Without calcification<br><i>n</i> = 72 | Calcification<br><i>n</i> = 15 | OR (95% CI)      | <i>P</i> -value <sup>2</sup> | AIC  |
|-------|------------------------------|---------------|----------|----------------------------------------|--------------------------------|------------------|------------------------------|------|
| IL1B  | rs16944<br>(G/A)             | Codominant    | G/G      | 29 (40.3%)                             | 6 (40%)                        | 1.00             | 0.97                         | 85.9 |
|       |                              |               | G/A      | 37 (51.4%)                             | 8 (53.3%)                      | 1.05 (0.33-3.35) |                              |      |
|       |                              |               | A/A      | 6 (8.3%)                               | 1(6.7%)                        | 0.81 (0.08-7.97) |                              |      |
|       |                              | Dominant      | G/G      | 29 (40.3%)                             | 6 (40%)                        | 1.00             | 0.98                         | 84   |
|       |                              |               | G/A-A/A  | 43 (59.7%)                             | 9 (60%)                        | 1.01 (0.33-3.15) |                              |      |
|       |                              | Recessive     | G/G-G/A  | 66 (91.7%)                             | 14(93.3%)                      | 1.00             | 0.83                         | 83.9 |
|       |                              |               | A/A      | 6 (8.3%)                               | 1(6.7%)                        | 0.79 (0.09-7.05) |                              |      |
|       |                              | Overdominant  | G/G-A/A  | 35 (48.6%)                             | 7 (46.7%)                      | 1.00             | 0.89                         | 84   |
|       |                              |               | G/A      | 37 (51.4%)                             | 8 (53.3%)                      | 1.08 (0.35-3.30) |                              |      |
|       |                              | Log-additive  | ---      | ---                                    | ---                            | 0.96 (0.39-2.38) | 0.94                         | 84   |
| IL12B |                              | Codominant    | T/T      | 41 (56.9%)                             | 12 (80%)                       | 1.00             | 0.11                         | 81.5 |

|         |                     |              |         |            |            |                  |       |      |
|---------|---------------------|--------------|---------|------------|------------|------------------|-------|------|
| IL28B   | rs3212227<br>(T/G)  |              | T/G     | 24 (33.3%) | 3 (20%)    | 0.43 (0.11-1.67) | 0.084 | 81   |
|         |                     |              | G/G     | 7 (9.7%)   | 0 (0%)     | 0.00 (0.00-NA)   |       |      |
|         |                     | Dominant     | T/T     | 41 (56.9%) | 12 (80%)   | 1.00             |       |      |
|         |                     |              | T/G-G/G | 31 (43.1%) | 3 (20%)    | 0.33 (0.09-1.27) |       |      |
|         |                     | Recessive    | T/T-T/G | 65 (90.3%) | 15 (100%)  | 1.00             |       |      |
|         |                     |              | G/G     | 7 (9.7%)   | 0 (0%)     | 0.00 (0.00-NA)   |       |      |
|         |                     | Overdominant | T/T-G/G | 48 (66.7%) | 12 (80%)   | 1.00             | 0.29  | 82.9 |
|         |                     |              | T/G     | 24 (33.3%) | 3 (20%)    | 0.50 (0.13-1.94) |       |      |
|         |                     | Log-additive | ---     | ---        | ---        | 0.34 (0.10-1.16) |       |      |
|         | rs12979860<br>(C/T) | Codominant   | C/C     | 30 (41.7%) | 7 (46.7%)  | 1.00             |       |      |
|         |                     |              | C/T     | 32 (44.4%) | 5 (33.3%)  | 0.67 (0.19-2.34) |       |      |
|         |                     |              | T/T     | 10 (13.9%) | 3 (20%)    | 1.29 (0.28-5.94) |       |      |
|         |                     | Dominant     | C/C     | 30 (41.7%) | 7 (46.7%)  | 1.00             | 0.72  | 83.9 |
|         |                     |              | C/T-T/T | 42 (58.3%) | 8 (53.3%)  | 0.82 (0.27-2.50) |       |      |
|         |                     | Recessive    | C/C-C/T | 62 (86.1%) | 12 (80%)   | 1.00             | 0.56  | 83.6 |
|         |                     |              | T/T     | 10 (13.9%) | 3 (20%)    | 1.55 (0.37-6.48) |       |      |
|         |                     | Overdominant | C/C-T/T | 40 (55.6%) | 10 (66.7%) | 1.00             | 0.42  | 83.3 |
|         |                     |              | C/T     | 32 (44.4%) | 5 (33.3%)  | 0.63 (0.19-2.01) |       |      |
|         |                     | Log-additive | ---     | ---        | ---        | 1.02 (0.47-2.24) | 0.96  | 84   |
| CCL2    | rs1024611<br>(A/G)  | Codominant   | A/A     | 37 (51.4%) | 8 (53.3%)  | 1.00             | 0.56  | 84.8 |
|         |                     |              | A/G     | 32 (44.4%) | 7 (46.7%)  | 1.01 (0.33-3.10) |       |      |
|         |                     |              | G/G     | 3 (4.2%)   | 0 (0%)     | 0.00 (0.00-NA)   |       |      |
|         |                     | Dominant     | A/A     | 37 (51.4%) | 8 (53.3%)  | 1.00             | 0.89  | 84   |
|         |                     |              | A/G-G/G | 35 (48.6%) | 7 (46.7%)  | 0.92 (0.30-2.82) |       |      |
|         |                     | Recessive    | A/A-A/G | 69 (95.8%) | 15 (100%)  | 1.00             | 0.28  | 82.8 |
|         |                     |              | G/G     | 3 (4.2%)   | 0 (0%)     | 0.00 (0.00-NA)   |       |      |
|         |                     | Overdominant | A/A-G/G | 40 (55.6%) | 8 (53.3%)  | 1.00             | 0.88  | 84   |
|         |                     |              | A/G     | 32 (44.4%) | 7 (46.7%)  | 1.09 (0.36-3.34) |       |      |
|         |                     | Log-additive | ---     | ---        | ---        | 0.82 (0.30-2.25) | 0.7   | 83.8 |
| DC-SIGN | rs735240<br>(G/A)   | Codominant   | G/G     | 27 (37.5%) | 4 (26.7%)  | 1.00             | 0.58  | 84.9 |
|         |                     |              | G/A     | 28 (38.9%) | 8 (53.3%)  | 1.93 (0.52-7.16) |       |      |
|         |                     |              | A/A     | 17 (23.6%) | 3 (20%)    | 1.19 (0.24-5.99) |       |      |
|         |                     | Dominant     | G/G     | 27 (37.5%) | 4 (26.7%)  | 1.00             | 0.42  | 83.3 |
|         |                     |              | G/A-A/A | 45 (62.5%) | 11 (73.3%) | 1.65 (0.48-5.70) |       |      |
|         |                     | Recessive    | G/G-G/A | 55 (76.4%) | 12 (80%)   | 1.00             | 0.76  | 83.9 |
|         |                     |              | A/A     | 17 (23.6%) | 3 (20%)    | 0.81 (0.20-3.21) |       |      |
|         |                     | Overdominant | G/G-A/A | 44 (61.1%) | 7 (46.7%)  | 1.00             | 0.3   | 82.9 |
|         |                     |              | G/A     | 28 (38.9%) | 8 (53.3%)  | 1.80 (0.59-5.50) |       |      |
|         |                     | Log-additive | ---     | ---        | ---        | 1.13 (0.54-2.36) | 0.74  | 83.9 |
| TLR2    | rs5743708<br>(G/A)  | ---          | G/G     | 65 (90.3%) | 13 (86.7%) | 1.00             | 0.69  | 83.8 |
|         |                     |              | G/A     | 7 (9.7%)   | 2 (13.3%)  | 1.43 (0.27-7.67) |       |      |
| TLR4    | rs4986791<br>(C/T)  | ---          | C/C     | 66 (91.7%) | 13 (86.7%) | 1.00             | 0.56  | 83.6 |
|         |                     |              | C/T     | 6 (8.3%)   | 2 (13.3%)  | 1.69 (0.31-9.33) |       |      |
| TLR9    | rs352140<br>(C/T)   | Codominant   | T/T     | 23 (31.9%) | 5 (33.3%)  | 1.00             | 0.41  | 84.2 |
|         |                     |              | C/T     | 35 (48.6%) | 9 (60%)    | 1.18 (0.35-3.98) |       |      |
|         |                     |              | C/C     | 14 (19.4%) | 1 (6.7%)   | 0.33 (0.03-3.11) |       |      |
|         |                     | Dominant     | T/T     | 23 (31.9%) | 5 (33.3%)  | 1.00             | 0.92  | 84   |
|         |                     |              | C/T-C/C | 49 (68.1%) | 10 (66.7%) | 0.94 (0.29-3.06) |       |      |
|         |                     | Recessive    | T/T-C/T | 58 (80.6%) | 14 (93.3%) | 1.00             | 0.19  | 82.3 |

|              |         |            |          |                  |      |      |
|--------------|---------|------------|----------|------------------|------|------|
|              | C/C     | 14 (19.4%) | 1 (6.7%) | 0.30 (0.04-2.44) |      |      |
| Overdominant | T/T-C/C | 37 (51.4%) | 6 (40%)  | 1.00             | 0.42 | 83.3 |
|              | C/T     | 35 (48.6%) | 9 (60%)  | 1.59 (0.51-4.92) |      |      |
| Log-additive | ---     | ---        | ---      | 0.74 (0.32-1.69) | 0.46 | 83.5 |

Data presented as number (%); MRI, magnetic resonance imaging; cCMV, congenital HCMV infection; OR, odds ratio; CI, confidence interval; NA, not applicable; AIC, Akaike information criteria; IL, Interleukin; CCL 2, C-C motif chemokine ligand 2; DC-SIGN, dendritic cell-specific ICAM-grabbing non-integrin; TLR, Toll-like receptor; <sup>1</sup> SNP database (dbSNP) reference number (ID number); <sup>2</sup> P-value for comparison between asymptomatic and symptomatic group.

**Table S7.** Associations between SNPs and cortical migration defects on MRI in infants with cCMV.

| Gene  | dbSNP ID number <sup>1</sup> | Genetic Model | Genotype | Without cortical migration defects<br><i>n</i> = 75 | Cortical migration defects<br><i>n</i> = 12 | OR (95% CI)      | P-value <sup>2</sup> | AIC  |
|-------|------------------------------|---------------|----------|-----------------------------------------------------|---------------------------------------------|------------------|----------------------|------|
| IL1B  | rs16944 (G/A)                | Codominant    | G/G      | 28 (37.3%)                                          | 7 (58.3%)                                   | 1.00             | 0.36                 | 73.8 |
|       |                              |               | G/A      | 41 (54.7%)                                          | 4 (33.3%)                                   | 0.39 (0.10-1.46) |                      |      |
|       |                              |               | A/A      | 6 (8%)                                              | 1 (8.3%)                                    | 0.67 (0.07-6.47) |                      |      |
|       |                              | Dominant      | G/G      | 28 (37.3%)                                          | 7 (58.3%)                                   | 1.00             | 0.17                 | 71.9 |
|       |                              |               | G/A-A/A  | 47 (62.7%)                                          | 5 (41.7%)                                   | 0.43 (0.12-1.47) |                      |      |
|       |                              | Recessive     | G/G-G/A  | 69 (92%)                                            | 11 (91.7%)                                  | 1.00             | 0.97                 | 73.8 |
|       |                              |               | A/A      | 6 (8%)                                              | 1 (8.3%)                                    | 1.05 (0.11-9.54) |                      |      |
|       |                              | Overdominant  | G/G-A/A  | 34 (45.3%)                                          | 8 (66.7%)                                   | 1.00             | 0.17                 | 71.9 |
|       |                              |               | G/A      | 41 (54.7%)                                          | 4 (33.3%)                                   | 0.41 (0.11-1.50) |                      |      |
|       |                              | Log-additive  | ---      | ---                                                 | ---                                         | 0.56 (0.19-1.62) | 0.27                 | 72.6 |
| IL12B | rs3212227 (T/G)              | Codominant    | T/T      | 46 (61.3%)                                          | 7 (58.3%)                                   | 1.00             | 0.28                 | 73.2 |
|       |                              |               | T/G      | 22 (29.3%)                                          | 5 (41.7%)                                   | 1.49 (0.43-5.24) |                      |      |
|       |                              |               | G/G      | 7 (9.3%)                                            | 0 (0%)                                      | 0.00 (0.00-NA)   |                      |      |
|       |                              | Dominant      | T/T      | 46 (61.3%)                                          | 7 (58.3%)                                   | 1.00             | 0.84                 | 73.8 |
|       |                              |               | T/G-G/G  | 29 (38.7%)                                          | 5 (41.7%)                                   | 1.13 (0.33-3.91) |                      |      |
|       |                              | Recessive     | T/T-T/G  | 68 (90.7%)                                          | 12 (100%)                                   | 1.00             | 0.14                 | 71.6 |
|       |                              |               | G/G      | 7 (9.3%)                                            | 0 (0%)                                      | 0.00 (0.00-NA)   |                      |      |
|       |                              | Overdominant  | T/T-G/G  | 53 (70.7%)                                          | 7 (58.3%)                                   | 1.00             | 0.4                  | 73.1 |
|       |                              |               | T/G      | 22 (29.3%)                                          | 5 (41.7%)                                   | 1.72 (0.49-6.01) |                      |      |
|       |                              | Log-additive  | ---      | ---                                                 | ---                                         | 0.85 (0.32-2.30) | 0.75                 | 73.7 |
| IL28B | rs12979860 (C/T)             | Codominant    | C/C      | 31 (41.3%)                                          | 6 (50%)                                     | 1.00             | 0.78                 | 75.3 |
|       |                              |               | C/T      | 33 (44%)                                            | 4 (33.3%)                                   | 0.63 (0.16-2.43) |                      |      |
|       |                              |               | T/T      | 11 (14.7%)                                          | 2 (16.7%)                                   | 0.94 (0.16-5.36) |                      |      |
|       |                              | Dominant      | C/C      | 31 (41.3%)                                          | 6 (50%)                                     | 1.00             | 0.57                 | 73.5 |
|       |                              |               | C/T-T/T  | 44 (58.7%)                                          | 6 (50%)                                     | 0.70 (0.21-2.39) |                      |      |
|       |                              | Recessive     | C/C-C/T  | 64 (85.3%)                                          | 10 (83.3%)                                  | 1.00             | 0.86                 | 73.8 |
|       |                              |               | T/T      | 11 (14.7%)                                          | 2 (16.7%)                                   | 1.16 (0.22-6.04) |                      |      |
|       |                              | Overdominant  | C/C-T/T  | 42 (56%)                                            | 8 (66.7%)                                   | 1.00             | 0.48                 | 73.3 |
|       |                              |               | C/T      | 33 (44%)                                            | 4 (33.3%)                                   | 0.64 (0.18-2.30) |                      |      |
|       |                              | Log-additive  | ---      | ---                                                 | ---                                         | 0.87 (0.36-2.10) | 0.76                 | 73.7 |
| CCL2  | rs1024611 (A/G)              | Codominant    | A/A      | 39 (52%)                                            | 6 (50%)                                     | 1.00             | 0.61                 | 74.8 |
|       |                              |               | A/G      | 33 (44%)                                            | 6 (50%)                                     | 1.18 (0.35-4.01) |                      |      |
|       |                              |               | G/G      | 3 (4%)                                              | 0 (0%)                                      | 0.00 (0.00-NA)   |                      |      |

|         |                 |              |          |            |            |                   |       |      |
|---------|-----------------|--------------|----------|------------|------------|-------------------|-------|------|
|         |                 | Dominant     | A/A      | 39 (52%)   | 6 (50%)    | 1.00              | 0.9   | 73.8 |
|         |                 |              | A/G-G/G  | 36 (48%)   | 6 (50%)    | 1.08 (0.32-3.67)  |       |      |
|         |                 | Recessive    | A/A-A/G  | 72 (96%)   | 12 (100%)  | 1.00              | 0.34  | 72.9 |
|         |                 |              | G/G      | 3 (4%)     | 0 (0%)     | 0.00 (0.00-NA)    |       |      |
|         |                 | Overdominant | A/A-G/G  | 42 (56%)   | 6 (50%)    | 1.00              | 0.7   | 73.7 |
|         |                 |              | A/G      | 33 (44%)   | 6 (50%)    | 1.27 (0.38-4.31)  |       |      |
|         |                 | Log-additive | ---      | ---        | ---        | 0.94 (0.32-2.78)  | 0.91  | 73.8 |
|         |                 | Codominant   | G/G      | 29 (38.7%) | 2 (16.7%)  | 1.00              | 0.15  | 72   |
|         |                 |              | G/A      | 28 (37.3%) | 8 (66.7%)  | 4.14 (0.81-21.23) |       |      |
|         |                 |              | A/A      | 18 (24%)   | 2 (16.7%)  | 1.61 (0.21-12.47) |       |      |
| DC-SIGN | rs735240 (G/A)  | Dominant     | G/G      | 29 (38.7%) | 2 (16.7%)  | 1.00              | 0.12  | 71.4 |
|         |                 |              | G/A-A/A  | 46 (61.3%) | 10 (83.3%) | 3.15 (0.64-15.42) |       |      |
|         |                 | Recessive    | G/G-G/A  | 57 (76%)   | 10 (83.3%) | 1.00              | 0.56  | 73.5 |
|         |                 |              | A/A      | 18 (24%)   | 2 (16.7%)  | 0.63 (0.13-3.16)  |       |      |
|         |                 | Overdominant | G/G-A/A  | 47 (62.7%) | 4 (33.3%)  | 1.00              | 0.057 | 70.2 |
|         |                 |              | G/A      | 28 (37.3%) | 8 (66.7%)  | 3.36 (0.93-12.17) |       |      |
|         |                 | Log-additive | ---      | ---        | ---        | 1.29 (0.58-2.88)  | 0.53  | 73.4 |
|         |                 | ---          | G/G      | 69 (92%)   | 9 (75%)    | 1.00              | 0.11  | 71.2 |
| TLR2    | rs5743708 (G/A) |              | G/A      | 6 (8%)     | 3 (25%)    | 3.83 (0.81-18.07) |       |      |
| TLR4    | rs4986791 (C/T) | ---          | C/C      | 67 (89.3%) | 12 (100%)  | 1.00              | 0.11  | 71.3 |
|         |                 |              | C/T      | 8 (10.7%)  | 0 (0%)     | 0.00 (0.00-NA)    |       |      |
| TLR9    | rs352140 (C/T)  | Codominant   | T/T      | 24 (32%)   | 4 (33.3%)  | 1.00              | 0.63  | 74.9 |
|         |                 |              | C/T      | 37 (49.3%) | 7 (58.3%)  | 1.14 (0.30-4.30)  |       |      |
|         |                 |              | C/C      | 14 (18.7%) | 1 (8.3%)   | 0.43 (0.04-4.23)  |       |      |
|         |                 | Dominant     | T/T      | 24 (32%)   | 4 (33.3%)  | 1.00              | 0.93  | 73.8 |
|         |                 |              | C/T -C/C | 51 (68%)   | 8 (66.7%)  | 0.94 (0.26-3.43)  |       |      |
|         |                 | Recessive    | T/T-C/T  | 61 (81.3%) | 11 (91.7%) | 1.00              | 0.34  | 72.9 |
|         |                 |              | C/C      | 14 (18.7%) | 1 (8.3%)   | 0.40 (0.05-3.33)  |       |      |
|         |                 | Overdominant | T/T-C/C  | 38 (50.7%) | 5 (41.7%)  | 1.00              | 0.56  | 73.5 |
|         |                 |              | C/T      | 37 (49.3%) | 7 (58.3%)  | 1.44 (0.42-4.94)  |       |      |
|         |                 | Log-additive | ---      | ---        | ---        | 0.78 (0.31-1.92)  | 0.58  | 73.5 |

Data presented as number (%); MRI, magnetic resonance imaging; cCMV, congenital HCMV infection; OR, odds ratio; CI, confidence interval; NA, not applicable; AIC, Akaike information criteria; IL, Interleukin; CCL 2, C-C motif chemokine ligand 2; DC-SIGN, dendritic cell-specific ICAM-grabbing non-integrin; TLR, Toll-like receptor; <sup>1</sup> SNP database (dbSNP) reference number (ID number); <sup>2</sup> P-value for comparison between asymptomatic and symptomatic group.
